# Supplementary material
Source: HighWire-hosted journal article supplement (https://ard.bmj.com/content/79/5/666)
Supplement: inline-supplementary-material-2 [file inline-supplementary-material-2.pdf]

Supplementary Figure 1. Chloroquine and hydroxychloroquine in the management of COVID-19: from pre-clinical data to clinical application as treatment and prevention.

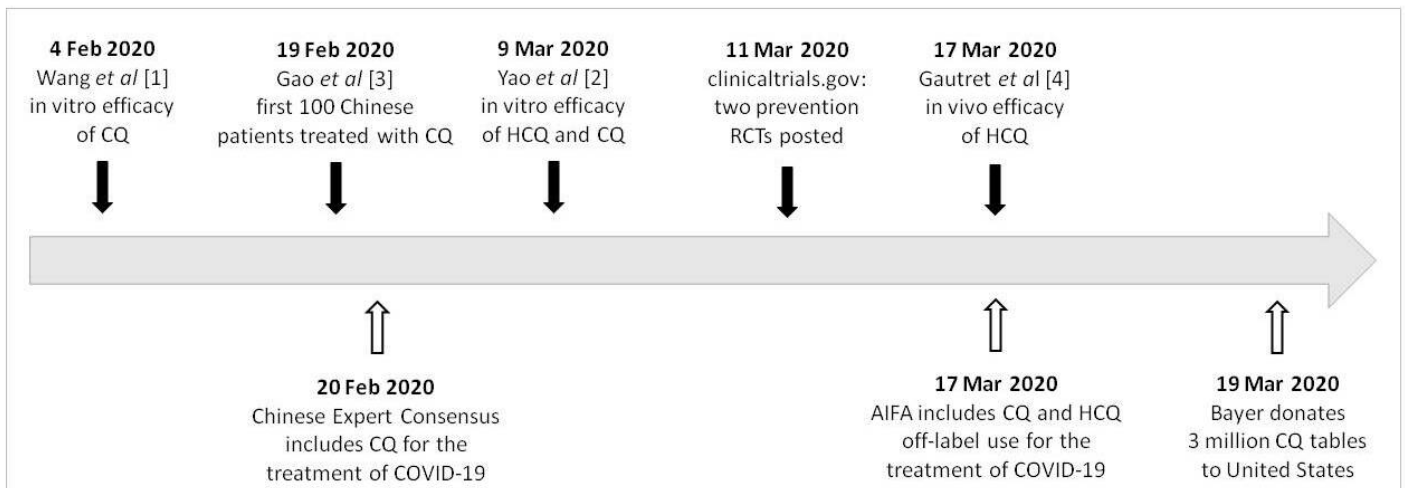

AIFA = Agenzia Italiana del Farmaco (*Italian Medicine Agency*); CQ = chloroquine, HCQ = hydroxychloroquine; RCT = randomized clinical trial.
